- strategies for primary and secondary prevention. *J Am Geriatr Soc* 2002; 50: 1329–35.
18. Suzuki M, Ohyama N, Yamada K *et al.* The relationship between fear of falling, activities of daily living and quality of life among elderly individuals. *Nurs Health Sci* 2002; 4: 155–61.
  19. Dellon AL. Diabetic neuropathy: review of a surgical approach to restore sensation, relieve pain, and prevent ulceration and amputation. *Foot Ankle Int* 2004; 25: 749–55.
  20. Kochman AB, Carnegie DH, Burke TJ. Symptomatic reversal of peripheral neuropathy in patients with diabetes. *J Am Podiatr Med Assoc* 2002; 92: 125–30.
  21. Leonard DR, Farooqi MH, Myers S. Restoration of sensation, reduced pain, and improved balance in subjects with diabetic peripheral neuropathy. *Diabetes Care* 2004; 27: 168–72.
  22. Prendergast JJ, Miranda G, Sanchez M. Reduced sensory impairment in patients with peripheral neuropathy. *Endocr Pract* 2004; 10: 24–30.
  23. Kochman AB. Monochromatic infrared photo energy and physical therapy for peripheral neuropathy: influence on sensation, balance and falls. *J Geriatr Phys Ther* 2004; 27: 16–19.
  24. Powell M, Carnegie D, Burke T. Reversal of diabetic peripheral neuropathy and new wound incidence: the role of MIRE. *Adv Skin Wound Care* 2004; 17: 295–300.
  25. DeLellis S, Carnegie DH, Burke TJ. Improved sensitivity in patients with peripheral neuropathy after treatment with monochromatic infrared energy. *J Am Podiatr Med Assoc* 2005; 95: 143–7.
  26. Harkless LB, DeLellis S, Carnegie DH, Burke TJ. Improved foot sensitivity and pain reduction in patients with peripheral neuropathy after treatment with monochromatic infrared photo energy—MIRE. *J Diab Complic*; 20: in press.
  27. Burke TJ. 5 Questions- and answers-about MIRE treatment. *Adv Skin Wound Care* 2003; 16: 369–71.
  28. National Diabetes Education Program. Feet Can Last a Lifetime: [http://www.ndep.nih.gov/diabetes/pubs/Feet\\_HCGuide.pdf/](http://www.ndep.nih.gov/diabetes/pubs/Feet_HCGuide.pdf/). Accessed on March 28, 2005.
  29. Centers for Medicare and Medicaid Services, Decision Memorandum CAG-00059, October 2001.
  30. Wallace C, Reiber GE, LeMaster J *et al.* Incidence of falls, risk factors for falls, and fall-related fractures in individuals with diabetes and a prior foot ulcer. *Diabetes Care* 2002; 25: 1983–6.
  31. Day L, Fildes B, Gordon I *et al.* Randomized factorial trial of falls prevention among older people living in their homes. *BMJ* 2002; 325: 128–33.

Received 6 June 2005; accepted 20 September 2005

*Age and Ageing* 2006; 35: 16–24  
doi:10.1093/ageing/afi205

© The Author 2005. Published by Oxford University Press on behalf of the British Geriatrics Society.  
All rights reserved. For Permissions, please email: journals.permissions@oxfordjournals.org

Published electronically 18 October 2005

## Urinary storage symptoms and comorbidities: a prospective population cohort study in middle-aged and older women

CATHERINE W. MCGROTHER, MADELEINE M. K. DONALDSON, TOM HAYWARD, RUTH MATTHEWS, HELEN M. DALLOSSO, COLIN HYDE, THE LEICESTERSHIRE MRC INCONTINENCE STUDY TEAM

Department of Epidemiology and Public Health, University of Leicester, 22–28 Princess Road West, Leicester LE1 6TP, UK

Address correspondence to: C. W. McGrother. Tel: (+44) 116 252 3197. Fax: (+44) 116 252 5423. Email: cm45@le.ac.uk

### Abstract

**Objective:** to identify predictive morbidities for urinary storage syndromes including indicators for neurological, musculoskeletal, cardiovascular, immune, lower bowel and psychological systems. This is the first study to test prior hypotheses, based on a literature review.

**Design:** this was a prospective cohort study involving 12,570 female respondents aged 40 or more registered with general practitioners and living at home in Leicestershire. Postal questionnaires were used at baseline and 1-year follow-up (response rates 65 and 79%, respectively).

**Measures:** pure stress urinary incontinence (SUI) and overactive bladder syndrome (OAB) were defined using standardised symptom indicators. Specific morbidities included reported medical diagnoses, standardised symptoms and general health indicators. Associations were identified using logistic regression, adjusting for age and physical impairment, with separate models for general and specific morbidities.

**Results:** multivariate morbidities consistently associated (i.e. both longitudinally and cross-sectionally) were SUI—cystitis and obesity; and OAB—bowel urgency, osteoporosis, imbalance, ankle swelling, cystitis, poor health and old age. Other independent predictors were SUI—multiple sclerosis and joint pain; and OAB—deep vein thrombosis and diabetes. Con-

sistent univariate indicators supported neurological, musculoskeletal, cardiovascular, immunological and psychological connections with both types of storage disorder plus an association with lower bowel problems for OAB.

**Conclusions:** abnormal urinary storage symptoms were predicted by obesity and poor general health, involving a range of systems of the body. OAB showed more extensive links than SUI with specific morbidities, including more medically diagnosed as opposed to symptom-based conditions. These findings were independent of problems with physical impairment.

**Keywords:** *urinary disorders, comorbidities, epidemiology, incontinence, aetiology, elderly*

## Background

Urinary incontinence has been seen mainly as a functional consequence of disabling diseases such as dementia or as a direct consequence of childbirth and other trauma. However, the bladder forms part of a sensitive and complex system of the body that operates largely autonomously but remains under voluntary control [1]. As such, it is vulnerable to general disease processes related to ageing. Thus, associations with poor health and obesity [2] could represent pathogenic as well as functional involvement of the bladder. A distinction between urge and stress incontinence is now well recognised. Urge incontinence is consistently linked with urinary urgency and, usually with frequency and nocturia, in the syndrome of overactive bladder syndrome (OAB). Stress incontinence represents a syndrome on its own. These symptomatic diagnoses show positive but limited association with urodynamically defined detrusor overactivity and stress incontinence [3]. The prevalence of urge incontinence increases with age. Stress incontinence by comparison shows a peak around age 45–59 more so than in old age [4, 5]. Most previous comorbidity studies have considered incontinence as a whole [6] or urge and stress inclusive of those with mixed symptoms [2, 7]. Consequently, differences in the sample age group translate into differences in case mix, making it difficult to identify consistent comorbid relationships.

The main clinically recognised comorbidities involve neurodegenerative diseases, e.g. dementia [8], Parkinson's disease, multiple sclerosis (MS) and spinal injury. Allied to these conditions, relationships with osteoporotic fracture [9] balance and falls [10] suggest a wider connection with the musculoskeletal system, although they have been attributed to urgency plus incontinence [11, 12]. Arthritis is also commonly associated with incontinence, but the mechanism for this is usually assumed to be functional rather than a disease process [8, 13]. Links with stroke [14] may reflect neurological damage but also wider atherosclerosis in addition to physical impairment. Episodes of cystitis have been linked to separately occurring incontinence [15]. Links with depression [11, 13] are usually assumed to be reactive. Links with faecal incontinence are also recognised [11, 16] usually in relation to childbirth trauma, cognitive impairment and faecal impaction.

In addition to neurological damage [1], OAB has been pathophysiologically associated with partial denervation leading to bladder irritability and decreased contractility [17] possibly due to ischaemia [18]. Stress incontinence has been associated with a decline in function of the urethral sphincter, pudendal nerve and pelvic floor muscles [19], possibly related to ageing [20] and constitutional susceptibility of

connective tissue [21] as well as to the traumatic and metabolic effects of childbirth and pregnancy [22].

Theoretically, related morbidities could occur together, either simultaneously or in sequence. Knowledge of the specific nature and sequence of development would improve understanding of the aetiological process and thereby the potential for prediction and prevention. The aim of this epidemiological study was to identify consistent and coherent general health and specific comorbidities implicated in disease processes, leading to the onset of pure forms of OAB and stress urinary incontinence (SUI) in women in the general population. The choice of comorbidities was informed by review of available literature [7].

## Methods

This was a prospective cohort study within the MRC Incontinence programme, designed to provide an evidence base for developing services in the UK. A random sample of 20,247 women aged 40 or more was drawn from the Leicestershire Health Authority lists of 108 general practices (i.e. 71% of all practices), of which 19,241 proved eligible. People living in residential and nursing homes were excluded. Postal questionnaires, including two reminders, were used at baseline and at 1-year follow-up. Structured information was collected on all lower urinary tract symptoms, general health, selected comorbidities, activities of daily living (ADL) and reproductive history. Potential biases were explored in a related study of non-responders at baseline [23]. Baseline cases and non-cases were also compared for dropout rate at 1-year follow-up. The numbers of cases identified were: at baseline—pure SUI 837, pure OAB 824 and mixed 1281; and at follow-up—pure SUI 239, pure OAB 317 and mixed 422.

## Definitions

Urinary storage symptoms definitions were consistent with recommended standards and validated against pad test and diary [3, 24]. SUI was defined as leakage on laughing, coughing or exercise occurring monthly or more. OAB was defined as urgency leakage (a strong desire to pass urine resulting in leakage) or urgency (a strength of urgency that was typically very strong or overwhelming) occurring monthly or more. Pure OAB and pure SUI were mutually exclusive. These symptoms were the most specific, independent and consistent markers identified from: (i) a regression analysis of the same symptoms associated with urodynamic diagnoses of detrusor overactivity and stress incontinence among 490 participants in a treatment trial within the same

programme [25]; and (ii) a review of similar studies [26–30] from which the current approach provided the most accurate results [28].

Specific comorbidity indicators were formulated for a range of diseases previously identified or hypothesised within the neurological, musculoskeletal, cardiovascular, immunological, psychological systems and the lower bowel. These included the following diagnoses apparently reported by a doctor: Parkinson's disease, MS, epilepsy, spinal cord injury, dementia or Alzheimer's disease, osteoporosis, hypertension, angina, heart attack, blocked leg arteries, deep-vein thrombosis, Raynaud's disease, diabetes, rheumatoid arthritis and depression. The level of agreement between self-reported and physician-reported chronic conditions has been shown to be very good for well-recognised diseases [31–33]. Those with well-established diagnostic criteria, e.g. diabetes, ischaemic heart disease and hypertension, tend to show better agreement than conditions such as arthritis and atherosclerosis.

Whilst medical diagnoses may be relatively accurate, this approach may be insensitive in detecting comorbid conditions. Many patients with symptoms of arthritis, for example, remain undiagnosed. Therefore, symptom indicators were formulated, using standardised questions for the following: joint pain/stiffness, breathlessness, ankle swelling, balance/dizziness, falls, hearing problems, difficulty remembering recent events and vision problems not fully corrected by wearing glasses, suggesting possibly cataract, diabetes, glaucoma or neuritis [34]. Self-reported conditions were also preferred for stroke, minimal trauma fracture, cystitis or urinary infection, bowel symptoms including soiling, urgency and straining, hay fever, dermatitis or eczema, asthma and 'allergy' to food, medication or elastoplast, the last representing a cell-mediated reaction.

Indicators for general health, as distinct from specific disease, included physical impairment in terms of ADL [35] and standard questions for general health and long-term health problems [36]. Self-reported height at age 20 and current weight were used to calculate a body mass index (BMI) which was categorised as underweight (<20), acceptable (20–25), overweight (>25–30) and obese (>30) [37].

### Analysis

Cross-sectional and longitudinal data were analysed separately throughout using logistic regression models. Likelihood ratio tests were used to determine the significance for each morbidity ( $P < 0.05$ ). All results were adjusted for age, and all analyses were repeated adjusting for age and ADL. Separate multivariate models were developed for general health and specific morbidity indicators to avoid distortion of both patterns of association. Parity was also included in the model for specific comorbidities, as a potential confounder.

Multivariate modelling was carried out for specific morbidities in two stages. First, potentially related morbidities were categorised into the following groups: neurological, musculoskeletal, cardiovascular, 'allergy' and lower bowel. All significant related morbidities from the univariate analysis were entered into a multivariate model using backward stepwise techniques to build a final model for each group. Second,

all the significant morbidities from each group together with cystitis, depression and parity (where univariately significant) were entered into a final model using similar techniques.

Cross-sectional analyses used prevalent cases of pure syndrome in the baseline survey. Longitudinal analyses used incident cases of pure syndrome at 1-year follow-up in people free from the relevant syndromes at baseline. These cases were regressed against baseline comorbidity reports in all analyses. Associations identified both longitudinally and cross-sectionally are described in the results as consistent comorbidities. Univariate associations across a range of similar system indicators were also considered to represent potential aetiological pointers. Bonferroni adjustments were not appropriate because morbidities were selected following literature review [38].

## Results

The age distribution of the sample aged 40 and over (range 40–98; median 58.0; mean 59.5; and SD 13.0) was similar to that for the UK. The response at baseline was 65.3%. Responders were slightly older than non-responders (median age 58 and 56 years) but included a slightly lower proportion (59.6%) of women aged 80 or more. The in-depth non-responders study suggested that 7% were unable to cooperate due to illness and frailty [23]. Response at follow-up was 79.7%. There was no difference in the dropout rate between cases and non-cases of urinary storage disorder at baseline. Baseline prevalences of pure SUI, pure OAB and mixed syndromes were 7.7, 7.7 and 12.7%, respectively. The incidence rates over 1 year were 3.6, 5.4 and 4.5%, respectively. Baseline prevalences for general health factors showed poor health affected 5.9%, long-term health problem 33.6% and obesity 19.5%, in line with other similar studies in women [36].

### Overactive bladder syndrome

#### General health

There were consistent longitudinal and cross-sectional univariate associations with all the general health indicators (Table 1). The strongest associations were with poor health and physical impairment. There was evidence of a significant cross-sectional link with both underweight and obesity. In the multivariate analysis, only poor health was consistently associated (Table 2). Physical impairment and long-term illness appeared to accompany rather than precede OAB, amid evidence of an association with old age.

#### Specific morbidity

There were consistent univariate links with the bowel (soiling, urgency and straining), neurological (spinal injury, poor vision, imbalance and memory), musculoskeletal (osteoporosis, falls, non-rheumatoid joint pain and fracture), cardiovascular (breathlessness, ankle swelling, ischaemic heart disease and diabetes), immunological (cystitis and medicine 'allergy') and psychological (depression) systems (Table 3). In the multivariate analysis, only bowel urgency, cystitis, imbalance, osteoporosis and ankle swelling were consistently associated

**Table 1.** General health factors associated with storage syndromes: univariate analyses in women<sup>a</sup>

| General factors       | Prevalence (%) | Stress incontinence      |                             | Overactive bladder       |                             |
|-----------------------|----------------|--------------------------|-----------------------------|--------------------------|-----------------------------|
|                       |                | Longitudinal OR (95% CI) | Cross-sectional OR (95% CI) | Longitudinal OR (95% CI) | Cross-sectional OR (95% CI) |
| <b>General health</b> |                |                          |                             |                          |                             |
| Excellent/very good   | 35.7           | 1.0*                     | 1.0***                      | 1.0***                   | 1.0***                      |
| Good                  | 36.9           | 1.5 (1.0, 2.0)           | 1.5 (1.3, 1.8)              | 1.3 (0.9, 1.6)           | 1.6 (1.3, 2.0)              |
| Fair                  | 21.6           | 1.5 (1.0, 2.2)           | 2.1 (1.7, 2.5)              | 2.3 (1.7, 3.1)           | 3.2 (2.6, 3.9)              |
| Poor                  | 5.9            | 2.3 (1.2, 4.3)           | 2.0 (1.4, 2.8)              | 4.0 (2.5, 6.3)           | 6.3 (4.8, 8.3)              |
| Long-term illness     | 33.6           | 1.0 (0.7, 1.4)           | 1.4 (1.2, 1.7)***           | 1.7 (1.3, 2.2)***        | 2.8 (2.4, 3.3)***           |
| <b>ADL</b>            |                |                          |                             |                          |                             |
| Best 1                | 18.2           | 1.0*                     | 1.0***                      | 1.0***                   | 1.0***                      |
| 2                     | 14.6           | 0.8 (0.5, 1.4)           | 1.6 (1.3, 2.1)              | 1.1 (0.7, 1.7)           | 1.4 (1.0, 2.0)              |
| 3                     | 36.4           | 1.4 (0.9, 2.0)           | 2.2 (1.8, 2.8)              | 1.4 (0.9, 2.0)           | 2.1 (1.6, 2.8)              |
| Worst 4               | 30.8           | 1.6 (1.0, 2.4)           | 2.4 (1.9, 3.2)              | 2.7 (1.8, 4.0)           | 4.9 (3.7, 6.6)              |
| <b>BMI</b>            |                |                          |                             |                          |                             |
| Underweight           | 3.2            | 0.7 (0.2, 2.4)           | 0.9 (0.5, 1.6)              | 1.2 (0.5, 2.5)           | 2.0 (1.4, 2.9)              |
| Acceptable            | 38.7           | 1.0***                   | 1.0***                      | 1.0*                     | 1.0***                      |
| Overweight            | 38.6           | 1.4 (0.9, 1.9)           | 1.4 (1.1, 1.6)              | 1.3 (1.0, 1.8)           | 1.2 (0.97, 1.4)             |
| Obese                 | 19.5           | 2.3 (1.5, 3.3)           | 2.0 (1.7, 2.5)              | 1.6 (1.1, 2.2)           | 1.5 (1.2, 1.8)              |

<sup>a</sup>Age adjusted. \* $P \leq 0.05$ , \*\* $P < 0.01$ , \*\*\* $P < 0.001$ . ADL, activities of daily living; BMI, body mass index.

**Table 2.** General health factors associated with storage syndromes: multivariate analyses

| General factors        | Stress incontinence      |                             | Overactive bladder       |                             |
|------------------------|--------------------------|-----------------------------|--------------------------|-----------------------------|
|                        | Longitudinal OR (95% CI) | Cross-sectional OR (95% CI) | Longitudinal OR (95% CI) | Cross-sectional OR (95% CI) |
| <b>General health</b>  |                          |                             |                          |                             |
| Excellent/very good    | 1.0                      | 1.0***                      | 1.0***                   | 1.0***                      |
| Good                   | 1.3 (0.9, 1.8)           | 1.4 (1.1, 1.7)              | 1.3 (0.9, 1.6)           | 1.5 (1.2, 1.8)              |
| Fair                   | 1.2 (0.7, 1.9)           | 1.8 (1.4, 2.3)              | 2.3 (1.7, 3.1)           | 1.9 (1.5, 2.5)              |
| Poor                   | 2.0 (0.9, 4.2)           | 2.0 (1.3, 3.1)              | 4.0 (2.5, 6.3)           | 3.2 (2.3, 4.5)              |
| Long-term illness      | 0.6 (0.3, 1.0)           | 1.0 (0.8, 1.3)              | 1.2 (0.8, 1.7)           | 1.6 (1.2, 2.0)***           |
| <b>ADL</b>             |                          |                             |                          |                             |
| Best 1                 | 1.0                      | 1.0***                      | 1.0                      | 1.0***                      |
| 2                      | 0.8 (0.4, 1.3)           | 1.6 (1.2, 2.1)              | 1.0 (0.6, 1.6)           | 1.3 (0.9, 1.8)              |
| 3                      | 1.1 (0.7, 1.7)           | 1.8 (1.4, 2.3)              | 1.0 (0.6, 1.6)           | 1.6 (1.1, 2.1)              |
| Worst 4                | 1.0 (0.5, 1.8)           | 1.4 (1.0, 2.0)              | 1.3 (0.7, 2.3)           | 2.1 (1.5, 3.0)              |
| <b>BMI</b>             |                          |                             |                          |                             |
| Underweight            | 0.7 (0.2, 2.4)           | 0.9 (0.5, 1.5)              | 0.9 (0.4, 2.1)           | 1.5 (0.9, 2.3)              |
| Acceptable             | 1.0***                   | 1.0***                      | 1.0                      | 1.0                         |
| Overweight             | 1.4 (0.9, 1.9)           | 1.2 (1.0, 1.5)              | 1.3 (1.0, 1.8)           | 1.1 (0.9, 1.3)              |
| Obese                  | 2.3 (1.6, 3.3)           | 1.7 (1.4, 2.1)              | 1.2 (0.9, 1.9)           | 1.1 (0.8, 1.4)              |
| Age (10-year increase) | 0.9 (0.7, 1.0)           | 0.8 (0.7, 0.8)***           | 1.2 (1.1, 1.3)**         | 1.1 (1.0, 1.2)*             |

\* $P \leq 0.05$ , \*\* $P < 0.01$ , \*\*\* $P < 0.001$ . ADL, activities of daily living; BMI, body mass index.

(Table 4). Diabetes and DVT were additional independent predictors whereas MS, memory and vision problems, rheumatoid arthritis and other joint pain plus faecal soiling and straining appeared to accompany rather than precede OAB. Parity was not associated with OAB.

**Stress incontinence**

*General health*

There were consistent longitudinal and cross-sectional univariate associations with obesity, poor health and physical impairment (Table 1). In the multivariate analysis, only

obesity was consistently associated (Table 2). Poor health and physical impairment appeared to accompany rather than precede SUI amid evidence of an association with young age.

*Specific morbidity*

There were consistent univariate links with the immunological (cystitis and food ‘allergy’), cardiovascular (breathlessness, ankle swelling and hypertension), neuromusculoskeletal (poor hearing and non-rheumatoid joint pain) and psychological

Table 3. Specific morbidity factors associated with storage syndromes: univariate analyses<sup>a</sup>

| Specific factors          | Prevalence % | Stress incontinence         |                                | Overactive bladder          |                                |
|---------------------------|--------------|-----------------------------|--------------------------------|-----------------------------|--------------------------------|
|                           |              | Longitudinal<br>OR (95% CI) | Cross-sectional<br>OR (95% CI) | Longitudinal<br>OR (95% CI) | Cross sectional<br>OR (95% CI) |
| Depression                | 20.2         | 1.4 (1.0, 2.0)*             | 1.8 (1.5, 2.1)***              | 1.4 (1.0, 1.9)*             | 2.0 (1.7, 2.4)***              |
| Dementia                  | 0.5          | No cases                    | No cases                       | 4.0 (0.8, 19.5)             | 2.9 (1.3, 6.7)*                |
| Poor memory               | 39.6         | 1.2 (0.9, 1.6)              | 1.8 (1.6, 2.1)***              | 1.5 (1.1, 1.8)***           | 2.0 (1.8, 2.4)***              |
| Parkinson's               | 0.4          | No cases                    | No cases                       | 2.9 (0.8, 10.3)             | 2.2 (0.9, 5.0)                 |
| Epilepsy                  | 1.2          | 1.9 (0.5, 6.1)              | 0.9 (0.4, 1.9)                 | 0.8 (0.1, 3.4)              | 2.2 (1.2, 3.9)*                |
| Multiple sclerosis        | 2.7          | 1.1 (0.1, 8.4)              | 1.0 (0.4, 2.9)                 | 1.0 (0.1, 7.6)              | 7.6 (4.1, 13.9)***             |
| Spinal injury             | 1.2          | 0.7 (0.2, 2.1)              | 1.1 (0.7, 1.8)                 | 2.1 (1.1, 3.8)*             | 2.5 (1.8, 3.6)***              |
| Poor vision               | 20.2         | 1.5 (1.0, 2.0)*             | 1.1 (0.9, 1.3)                 | 1.5 (1.1, 2.0)**            | 2.2 (1.8, 2.5)***              |
| Poor hearing              | 29.0         | 1.4 (1.0, 1.9)*             | 1.5 (1.3, 1.7)***              | 1.3 (0.9, 1.6)              | 1.6 (1.3, 1.8)***              |
| Poor balance              | 34.1         | 1.3 (0.9, 1.7)              | 1.5 (1.3, 1.8)***              | 1.9 (1.5, 2.4)***           | 2.4 (2.1, 2.8)***              |
| Falls                     | 26.9         | 1.3 (0.9, 1.8)              | 1.1 (0.9, 1.3)                 | 1.4 (1.0, 1.7)*             | 1.9 (1.7, 2.3)***              |
| Osteoporosis              | 6.7          | 0.9 (0.4, 1.7)              | 1.5 (1.1, 2.0)*                | 1.9 (1.3, 2.8)**            | 2.1 (1.6, 2.7)***              |
| Fracture                  | 15.0         | 1.1 (0.7, 1.6)              | 1.1 (0.8, 1.3)                 | 1.4 (1.0, 1.8)*             | 1.3 (1.1, 1.5)*                |
| Rheumatoid arthritis (RA) | 15.6         | 1.1 (0.7, 1.7)              | 1.1 (0.8, 1.3)                 | 1.3 (0.9, 1.8)              | 1.9 (1.5, 2.2)***              |
| Joint pain (non-RA)       | 38.6         | 1.5 (1.1, 2.0)*             | 1.4 (1.2, 1.7)***              | 1.3 (1.0, 1.6)*             | 1.5 (1.3, 1.8)***              |
| Diabetes                  | 5.4          | 1.6 (0.8, 2.8)              | 1.1 (0.7, 1.6)                 | 2.0 (1.2, 3.1)**            | 1.4 (1.1, 2.0)*                |
| Stroke                    | 3.6          | 1.9 (0.9, 3.5)              | 1.1 (0.7, 1.7)                 | 1.7 (1.0, 2.8)              | 2.0 (1.5, 2.7)***              |
| Heart attack /angina      | 7.5          | 1.2 (0.6, 2.2)              | 1.7 (1.2, 2.3)**               | 1.6 (1.0, 2.4)*             | 2.1 (1.7, 2.7)***              |
| Blocked arteries          | 3.7          | 1.0 (0.4, 2.6)              | 0.8 (0.5, 1.4)                 | 1.5 (0.8, 2.7)              | 1.7 (1.2, 2.4)**               |
| Hypertension              | 27.9         | 1.5 (1.1, 2.0)*             | 1.3 (1.1, 1.5)**               | 1.2 (0.9, 1.5)              | 1.4 (1.2, 1.6)***              |
| Raynaud's                 | 1.9          | 1.3 (0.5, 3.2)              | 1.0 (0.6, 1.8)                 | 0.9 (0.3, 2.3)              | 2.0 (1.2, 3.1)**               |
| DVT                       | 2.5          | 0.5 (0.1, 2.2)              | 1.1 (0.7, 1.9)                 | 2.7 (1.5, 4.7)**            | 1.2 (0.8, 2.0)                 |
| Ankle swelling            | 39.2         | 1.5 (1.1, 1.9)**            | 1.5 (1.3, 1.7)***              | 1.7 (1.4, 2.2)***           | 1.9 (1.7, 2.2)***              |
| Breathlessness            | 32.3         | 1.6 (1.2, 2.1)**            | 1.9 (1.7, 2.3)***              | 1.9 (1.5, 2.3)***           | 2.1 (1.8, 2.5)***              |
| Asthma                    | 10.6         | 1.2 (0.7, 1.9)              | 1.9 (1.6, 2.4)***              | 1.0 (0.7, 1.5)              | 1.2 (0.9, 1.5)                 |
| Hay fever                 | 15.6         | 1.1 (0.7, 1.6)              | 1.4 (1.1, 1.6)**               | 1.1 (0.8, 1.5)              | 1.0 (0.8, 1.3)                 |
| Dermatitis/eczema         | 12.0         | 0.8 (0.4, 1.2)              | 1.1 (0.9, 1.3)*                | 1.4 (0.9, 1.9)              | 1.3 (1.1, 1.6)*                |
| Food allergy              | 9.0          | 1.6 (1.0, 2.4)*             | 1.3 (1.0, 1.7)*                | 1.4 (0.9, 2.0)              | 1.4 (1.1, 1.8)**               |
| Medicine allergy          | 17.4         | 1.1 (0.8, 1.6)              | 1.5 (1.2, 1.8)***              | 1.6 (1.2, 2.1)**            | 1.4 (1.2, 1.7)**               |
| Elastoplast allergy       | 10.1         | 1.4 (0.9, 2.1)              | 1.4 (1.1, 1.7)**               | 1.6 (1.1, 2.3)**            | 1.2 (0.9, 1.5)                 |
| Cystitis                  | 14.4         | 2.0 (1.5, 2.8)***           | 1.9 (1.6, 2.3)***              | 1.6 (1.1, 2.2)**            | 2.6 (2.2, 3.1)***              |
| Bowel                     |              |                             |                                |                             |                                |
| Soiling                   | 2.0          | 2.0 (0.9, 4.6)              | 1.8 (1.2, 2.7)*                | 4.0 (2.3, 6.9)***           | 5.3 (3.9, 7.2)***              |
| Urgency                   | 8.2          | 1.4 (0.8, 2.2)              | 1.8 (1.4, 2.3)***              | 2.6 (1.7, 3.7)***           | 4.2 (3.4, 5.2)***              |
| Straining                 | 14.8         | 1.3 (0.8, 1.8)              | 1.8 (1.5, 2.2)***              | 1.7 (1.2, 2.2)**            | 2.4 (2.0, 2.8)***              |
| Parity                    |              |                             |                                |                             |                                |
| 0                         | 12.8         | 1.0                         | 1.0***                         | 1.0                         | 1.0                            |
| 1                         | 14.3         | 1.3 (0.7, 2.2)              | 1.3 (0.9, 1.7)                 | 1.0 (0.6, 1.5)              | 1.2 (0.9, 1.6)                 |
| 2                         | 38.5         | 1.5 (0.9, 2.4)              | 1.7 (1.3, 2.2)                 | 0.9 (0.6, 1.3)              | 1.1 (0.8, 1.4)                 |
| 3+                        | 34.5         | 1.7 (1.0, 2.8)              | 1.9 (1.5, 2.5)                 | 1.1 (0.8, 1.6)              | 1.2 (0.9, 1.5)                 |

<sup>a</sup>Age adjusted. \* $P \leq 0.05$ , \*\* $P < 0.01$ , \*\*\* $P < 0.001$ .

(depression) systems (Table 3). In the multivariate analysis, only cystitis was consistently associated (Table 4). MS and joint pain were additional predictors, whereas depression, memory problems, poor hearing, breathlessness, asthma and bowel straining appeared to accompany rather than precede SUI. The independent cross-sectional association between parity and prevalent rather than incident cases of SUI probably reflects the distant effects of childbirth in this age group.

Mixed incontinence showed almost all the elements of both SUI and OAB but usually more strongly than either of the pure forms (results not shown).

## Discussion

Pure OAB was independently predicted by poor health rather than by poor physical impairment. The association with old age, although consistent with other studies [2, 39], disappeared after controlling for a full range of specific comorbidities, suggesting that the condition is age related rather than age dependent. The independent specific predictors included bowel urgency, imbalance, osteoporosis, ankle swelling, diabetes, DVT and cystitis. Diabetes has been associated previously with urge incontinence [2]. Other studies involving older people, in whom OAB predominates, have also shown a relationship with

**Table 4.** Specific morbidity factors associated with storage syndromes: multivariate analyses

| Specific factors       | Stress incontinence      |                             | Overactive bladder       |                             |
|------------------------|--------------------------|-----------------------------|--------------------------|-----------------------------|
|                        | Longitudinal OR (95% CI) | Cross-sectional OR (95% CI) | Longitudinal OR (95% CI) | Cross sectional OR (95% CI) |
| Depression             |                          | 1.4 (1.1, 1.7)***           |                          |                             |
| Memory                 |                          | 1.4 (1.1, 1.7)***           |                          | 1.2 (1.0, 1.5)*             |
| Multiple sclerosis     | 1.5 (1.0, 2.1)*          |                             |                          | 3.0 (1.2, 7.8)*             |
| Vision                 |                          |                             |                          | 1.3 (1.0, 1.6)*             |
| Hearing                |                          | 1.2 (1.0, 1.5)*             |                          |                             |
| Balance                |                          |                             | 1.4 (1.0, 1.9)**         | 1.4 (1.1, 1.7)***           |
| Osteoporosis           |                          |                             | <b>1.8 (1.1, 2.9)*</b>   | <b>1.5 (1.0, 2.1)*</b>      |
| Rheumatoid arthritis   |                          |                             |                          | 1.5 (1.0, 2.0)*             |
| Joint pain             | 1.4 (1.0, 1.9)*          |                             |                          | 1.4 (1.1, 1.8)**            |
| Diabetes               |                          |                             | 2.2 (1.3, 3.6)**         |                             |
| DVT                    |                          |                             | 2.5 (1.3, 4.6)**         |                             |
| Ankle swelling         |                          |                             | <b>1.4 (1.0, 1.9)**</b>  | <b>1.2 (0.9, 1.5)*</b>      |
| Breathlessness         |                          | 1.4 (1.1, 1.8)***           |                          |                             |
| Asthma                 |                          | 1.5 (1.1, 1.9)**            |                          |                             |
| Cystitis               | <b>1.9 (1.3, 2.7)***</b> | <b>1.5 (1.2, 1.9)***</b>    | <b>1.6 (1.1, 2.3)**</b>  | <b>2.1 (1.6, 2.6)***</b>    |
| Bowel                  |                          |                             |                          |                             |
| Soiling                |                          |                             |                          | 1.8 (1.1, 2.9)*             |
| Urgency                |                          |                             | <b>2.2 (1.5, 3.4)**</b>  | <b>2.8 (2.1, 3.7)***</b>    |
| Straining              |                          | 1.5 (1.2, 1.9)***           |                          | 1.4 (1.0, 1.8)**            |
| Parity                 |                          |                             |                          |                             |
| 0                      |                          | 1.0***                      |                          |                             |
| 1                      |                          | 1.2 (0.8, 1.7)              |                          |                             |
| 2                      |                          | 1.6 (1.2, 2.2)              |                          |                             |
| 3+                     |                          | 1.7 (1.2, 2.3)              |                          |                             |
| Age (10-year increase) | <b>0.8 (0.6, 0.9)**</b>  | <b>0.7 (0.6, 0.8)***</b>    |                          |                             |
| ADL                    |                          |                             |                          |                             |
| Best                   | 1                        | 1.0***                      |                          | 1.0***                      |
| Worst                  | 2                        | 1.4 (1.0, 1.8)              |                          | 1.1 (0.7, 1.6)              |
|                        | 3                        | 1.7 (1.3, 2.2)              |                          | 1.3 (0.9, 1.9)              |
|                        | 4                        | 1.3 (0.9, 1.8)              |                          | 2.0 (1.3, 3.0)              |

\* $P \leq 0.05$ , \*\* $P < 0.01$ , \*\*\* $P < 0.001$ . Consistent factors in bold. ADL, activities of daily living.

diabetes [11, 40, 41] and similarly for osteoporosis [9], dementia [42], faecal incontinence [11, 43], imbalance [10] cardio-pulmonary [6, 9, 11, 40], cardiovascular [13, 44] and poor health [42]. However, connections between OAB and DVT or ankle swelling have not been demonstrated before. DVT has been linked with diabetes and other predisposing factors including varicose veins, use of hormone replacement therapy (HRT) and thrombophilic states [45].

The diversity of comorbidity and system indicators for OAB suggests the existence of several subgroups of OAB and/or a common underlying problem involving multiple organs. Possible mechanisms undermining multiple systems could include suboptimal nutrition (particularly for people with vulnerable constitutions including diabetes). The relatively prominent association with bowel urgency, soiling and straining may implicate bowel dysfunction. Artificially induced diabetic neuropathy provides a mechanism for one of the main animal models for OAB [17]. Diabetes is also consistent with the proposed model of denervation probably related to ischaemia [18], triggering increased excitability of the smooth bladder muscle.

Osteoporosis has been proposed as a long-latency deficiency disorder and related to suboptimal vitamin D status [46, 47]. Vitamin D is associated with physical dysfunction and balance problems [48], both of which independently

accompanied OAB. Calcium absorption and metabolism are also dependent on vitamin D and are important for smooth muscle tone and contractility. Links with vitamin D deficiency have also been observed for diabetes [49].

Pure SUI was predicted by obesity and not by physical impairment. The association with young age remained after controlling for potential specific comorbidities. The independent specific predictors were confined to cystitis, MS and joint pain with parity also implicated. Relationships with obesity [50, 51] and childbirth [52, 53] have consistently been shown for SUI [2, 22, 54–61] more so than urge incontinence [2]. An inverse association with age is also a consistent finding [58] and has been related to a disappearance of the effect of parity with age [55]. Association with joint problems [13] has been reported for incontinence in older women, but a connection between MS and SUI has not. Links with asthma may suggest an element of immune dysfunction.

SUI has been associated with pelvic floor weakness, prolapse and bladder neck hypermobility [19]. The underlying mechanism proposed for this is a constitutional variation in collagen and its remodelling via enzymes susceptible to steroid hormones [21]. In this model, obesity may exert a direct mechanical load on the pelvic floor plus an indirect effect via oestrogen generated from adipose tissue [62]. It is interesting in this respect that SUI is observed to peak around age 45–59

and dip thereafter [58], perhaps in line with hormonal and obesity patterns. Obesity and laxity of joints are also associated with osteoarthritis for which potential systemic risk factors include HRT, poor nutrition and genetic factors [63].

Cystitis is commonly linked with incontinence [41, 44, 64, 65], and the potential for misinterpretation of symptoms is considerable. However, in a careful clinical study, although both stress and urge were related to cystitis during acute episodes, the relationship was confined to stress incontinence. In the same study, cystitis was associated with urogynaecological surgery, and the suggested underlying mechanisms involved predisposition to such surgery and a degree of susceptibility to infection [15]. Acute episodes of cystitis involve urgency and incontinence, but it has also been suggested that at other times, the urothelium may detect noxious chemicals and bacteria and transmit signals to induce emptying [1], thereby perpetuating a link with urge incontinence.

Depression was consistently associated with both OAB and SUI univariately. This is consistent with other studies of incontinence as a whole [11, 13, 66]. In the current study, the association between OAB and depression appeared to depend largely on the presence of the physical morbidities. However, there was evidence to suggest that depression may accompany the onset of SUI independently.

The less-than-expected associations with dementia [13, 42], stroke [11, 13, 14, 40, 42] and Parkinson's disease [9, 13, 67] could be because of under-representation of these groups within the present study. The sample excluded those in residential and nursing homes where prevalences are particularly high. There was also a small element of non-response bias in relation to the postal questionnaire for those unable to cooperate because of poor health. Problems with random measurement error, inherent to the method of relying on reported conditions, are likely to reduce the strength of observed associations. Thus, this approach may be prone to missing genuine connections, particularly for very disabling conditions, but it has the advantage of providing a population perspective.

Certain conditions were not predictive, yet were associated cross-sectionally. This may be because of a greater power provided by the larger number of prevalent compared to incident cases, particularly for relatively rare morbidities. For more common conditions, the pattern of association is likely to reflect the sequence of the disease process. Parity may not register as a predictor for SUI in this study because its effect in generating new cases occurred at an earlier age. Most morbidities related to newly incident cases also appeared to be associated with prevalent cases of incontinence, but some were confined to incidence, including DVT and diabetes for OAB and MS and joint pain for SUI. Morbidities with high-incident and low-prevalent effects may be recent in onset, remittent or responsive to treatment. In the multivariate analyses, it is also possible that the separate cross-sectional and longitudinal models selected different indicators for statistical reasons despite being based on exactly the same range of indicators.

Methodologically, the current study was relatively large scale and wide ranging compared to previous studies, providing good power to detect specific associations, subject

to the usual chance effects. Using mutually exclusive symptom syndromes maximises diagnostic accuracy and minimises heterogeneity because of mixed forms. Extensive misclassification would tend to undermine rather than re-enforce the distinctive comorbidity patterns observed for OAB and SUI. Our objective was to identify potential morbid associations rather than any form of predictor. Therefore, we allowed adjustment for age and physical impairment but deliberately did not adjust for lifestyle, socioeconomic, physical measurement or quality of life factors likely to be involved in the same chain of events and thereby distorting or reducing the chances of detecting morbid associations. We recognise potential relationships with drugs and surgery used to treat the morbidities and lifestyle factors but consider these to be beyond the scope of the current article. Clinical confirmation of these findings is needed.

---

### Key points

- This prospective study confirmed previously identified specific associations between SUI and obesity, parity and cystitis.
  - New independent predictors for SUI identified were MS and joint pain (i.e. non-rheumatoid arthritis).
  - Previously identified associations with incontinence in older people were confirmed prospectively in relation to OAB for poor health, diabetes, cystitis and bowel urgency problems.
  - New independent predictors for OAB identified were osteoporosis, DVT, ankle swelling and imbalance.
  - Physical impairment as an independent factor appeared to accompany rather than precede the development of storage symptoms.
- 

### Acknowledgements

We acknowledge the advice of the members of the MRC Steering Committee and the general practitioners who supported the study, which was conducted with the approval of the Ethical Committee and the informed consent of participants. The Medical Research Council funded the research and played no part in its design or execution.

### Conflicts of interest

There were no conflicts of interest for any of the authors.

### References

1. de Groat WC. A neurologic basis for the overactive bladder. *Urology* 1997; 50: 36–52; discussion 53–6.
2. Brown JS, Grady D, Ouslander JG, Herzog AR, Varner RE, Posner SF. Prevalence of urinary incontinence and associated risk factors in postmenopausal women. *Obstet Gynecol* 1999; 94: 66–70.
3. Abrams P, Cardozo L, Fall M *et al.* The standardisation of terminology of lower urinary tract function: report from the Standardisation Sub-committee of the International Continence Society. *Neurourol Urodyn* 2002; 21: 167–78.

4. Hannestad YS, Rortveit G, Sandvik H, Hunskaar S. A community-based epidemiological survey of female urinary incontinence; the Norwegian EPINCONT study. *J Clin Epidemiol* 2000; 53: 1150–7.
5. Hunskaar S, Burgio K, Diokno AC *et al.* Epidemiology and natural history of urinary incontinence. In: Abrams P, Cardozo L, Khoury S, Wein A, eds. *Incontinence 2nd International Consultation on Incontinence*, 2nd edition. Plymbridge: Health Publications Ltd, 2002.
6. Maclennan AH, Taylor AW, Wilson DH, Wilson D. The prevalence of pelvic floor disorders and their relationship to gender, age, parity and mode of delivery. *Br J Obstet Gynaecol* 2000; 107: 1460–70.
7. McGrother CM, Donaldson M, Wagg A *et al.* Continence. The epidemiologically based needs assessment reviews. In: Stevens A, Raftery J, Mant J, Simpson S, eds. *Health Care Needs Assessment*, 3rd series, 1st edn. Oxford: Radcliffe Publishing, 2005 (in press).
8. McGrother CW, Jagger C, Clarke M, Castleden CM. Handicaps associated with incontinence – implications for management. *J Epidemiol Community Health* 1990; 44: 246–8.
9. Maggi S, Minicuci N, Langlois J, Pavan M, Enzi G, Crepaldi G. Prevalence rate of urinary incontinence in community-dwelling elderly individuals: the Veneto Study. *J Gerontol A Biol Sci Med Sci* 2001; 56: M14–M18.
10. Tinetti ME, Inouye SK, Gill TM, Doucette JT. Shared risk-factors for falls, incontinence, and functional dependence – unifying the approach to geriatric syndromes. *JAMA* 1995; 273: 1348–53.
11. Wetle T, Scherr P, Branch LG *et al.* Difficulty with holding urine among older persons in a geographically defined community: prevalence and correlates. *J Am Geriatr Soc* 1995; 43: 349–55.
12. Brown JS, Vittinghoff E, Wyman JF *et al.* Urinary incontinence: does it increase risk for falls and fractures? *J Am Geriatr Soc* 2000; 48: 721–5.
13. Thom DH, Haan MN, Vandeneeden SK. Medically recognized urinary incontinence and risks of hospitalization, nursing home admission and mortality. *Age Ageing* 1997; 26: 367–74.
14. Brittain KR, Perry SI, Peet SM *et al.* Prevalence and impact of urinary symptoms among community-dwelling stroke survivors. *Stroke* 2000; 31: 886–91.
15. Mommsen S, Foldspang A, Elving L, Lam GW. Cystitis as a correlate of female urinary incontinence. *Int Urogynecol J* 1994; 5: 135–40.
16. Chiarelli P, Brown W, Mcelduff P. Leaking urine: prevalence and associated factors in Australian women. *Neurourol Urodyn* 1999; 18: 567–77.
17. Brading AF. A myogenic basis for the overactive bladder. *Urology* 1997; 50: 57–67.
18. Fry CH. Discussion: Cellular physiology of detrusor smooth muscle and the development of bladder instability: Possible mechanisms. *Urology* 1997; 50: 70–1.
19. King JK, Freeman RM. Is antenatal bladder neck mobility a risk factor for postpartum stress incontinence? *Br J Obstet Gynaecol* 1998; 105: 1300–7.
20. Strasser H, Tiefenthaler M, Steinlechner M, Bartsch G, Konwalinka G. Urinary incontinence in the elderly and age-dependent apoptosis of rhabdosphincter cells. *Lancet* 1999; 354: 918–9.
21. Jackson SR, Avery NC, Tarlton JF, Eckford SD, Abrams P, Bailey AJ. Changes in metabolism of collagen in genitourinary prolapse. *Lancet* 1996; 347: 1658–61.
22. Foldspang A, Mommsen S, Djurhuus JC. Prevalent urinary incontinence as a correlate of pregnancy, vaginal childbirth, and obstetric techniques. *Am J Public Health* 1999; 89: 209–12.
23. Dallosso HM, Matthews RJ, McGrother CW *et al.* An investigation into nonresponse bias in a postal survey on urinary symptoms. *BJU Int* 2003; 91: 631–6.
24. Shaw C, Matthews RJ, Perry SI *et al.* Validity and reliability of an interviewer-administered questionnaire to measure the severity of lower urinary tract symptoms of storage abnormality: the Leicester Urinary Symptom Questionnaire. *BJU Int* 2002; 90: 205–15.
25. Williams KS, Assassa RP, Smith NKG *et al.* Development, implementation and evaluation of a new nurse-led continence service: a pilot study. *J Clin Nurs* 2000; 9: 566–73.
26. Bergman A, Bader K. Reliability of the patient's history in the diagnosis of urinary incontinence. *Int J Gynecol Obstet* 1990; 32: 255–9.
27. Hilton P, Stanton SL. Algorithmic method for assessing urinary incontinence in elderly women. *Br Med J* 1981; 282: 940–2.
28. Lagro-Janssen ALM, Debruyne FMJ, Vanweel C. Value of the patients case history in diagnosing urinary incontinence in general practice. *Br J Urol* 1991; 67: 569–72.
29. Ramsay IN, Hilton P, Rice N. The symptomatic characterization of patients with detrusor instability and those with genuine stress incontinence. *Int Urogynecol J* 1993; 4: 23–6.
30. Clarke B. The role of urodynamic assessment in the diagnosis of lower urinary tract disorders. *Int Urogynecol J* 1997; 8: 196–9.
31. Kriegsman D, Penninx B, van Eijk J, Boeke A, Deeg D. Self-reports and general practitioner information on the presence of chronic diseases in community dwelling elderly. A study of the accuracy of patients' self-reports and determinants of inaccuracy. *J Clin Epidemiol* 1996; 49: 1407–17.
32. Haapanen N, Miilunpalo S, Pasanen M, Oja P, Vuori, I. Agreement between questionnaire data and medical records of chronic diseases in middle-aged and elderly Finnish men and women. *Am J Epidemiol* 1997; 145: 762–9.
33. Kehoe R, Wu S, Leske MC, Chylack LT Jr. Comparing self-reported and physician-reported medical history. *Am J Epidemiol* 1994; 139: 813–8.
34. Cook DG, Shaper AG. Breathlessness, angina pectoris and coronary artery disease. *Am J Cardiol* 1989; 63: 921–4.
35. Ware JE, Snow KK, Kosinski M, Gandek B. SF – 36 Health Survey Manual And Interpretation Guide. Boston, MA: The Health Institute, 1993.
36. Walker A, Maher J, Coulthard M, Goddard E, Thomas M. *Living in Britain: Results from the 2000 General Household Survey*. Great Britain: The Stationery Office, 2001.
37. Spencer EA, Appleby PN, Davey GK, Key TJ. Validity of self-reported height and weight in 4808 Epic-Oxford participants. *Public Health Nutr* 2002; 5: 561–5.
38. Perneger T. What's wrong with Bonferroni adjustments? *Br Med J* 1998; 316: 1236–8.
39. Ueda T, Tamaki M, Kageyama S, Yoshimura N, Yoshida O. Urinary incontinence among community-dwelling people aged 40 years or older in Japan: Prevalence, risk factors, knowledge and self-perception. *Int J Urol* 2000; 7: 95–103.
40. Brown JS, Seeley DG, Fong J, Black DM, Ensrud KE, Grady D. Urinary incontinence in older women: who is at risk? *Obstet Gynecol* 1996; 87: 715–21.
41. Landi F, Cesari M, Russo A *et al.* Potentially reversible risk factors and urinary incontinence in frail older people living in the community. *Age Ageing* 2003; 32: 194–9.



42. Nakanishi N, Tatara K, Naramura H, Fujiwara H, Takashima Y, Fukuda H. Urinary and fecal incontinence in a community-residing older population in Japan. *J Am Geriatr Soc* 1997; 45: 215–9.
43. Kok ALM, Voorhorst FJ, Burger CW, Vanhouten P, Kenemans P, Janssens J. Urinary and fecal incontinence in community-residing elderly women. *Age Ageing* 1992; 21: 211–5.
44. Hellstrom L, Ekelund P, Milsom I, Mellstrom D. The prevalence of urinary-incontinence and use of incontinence aids in 85-year-old men and women. *Age Ageing* 1990; 19: 383–9.
45. Anderson FA Jr, Spencer FA. Risk factors for venous thromboembolism. *Circulation* 2003; 107: 9–16.
46. Heaney RP. Long-latency deficiency disease: insights from calcium and vitamin D. *Am J Clin Nutr* 2003; 78: 912–9.
47. Gennari C. Calcium and vitamin D nutrition and bone disease of the elderly. *Public Health Nutr* 2001; 4: 547–59.
48. Janssen HC, Samson MM, Verhaar HJ. Vitamin D deficiency, muscle function, and falls in elderly people. *Am J Clin Nutr* 2002; 75: 611–5.
49. Boucher BJ. Inadequate vitamin D status. Does it contribute to the disorders comprising syndrome 'X'? *Br J Nutr* 1998; 79: 315–27.
50. Bortolotti A, Bernardini B, Colli E *et al.* Prevalence and risk factors for urinary incontinence in Italy. *Eur Urol* 2000; 37: 30–5.
51. Hannestad YS, Rortveit G, Daltveit AK, Hunskaar S. Are smoking and other lifestyle factors associated with female urinary incontinence? The Norwegian EPINCONT Study. *BJOG* 2003; 110: 247–54.
52. Sampsel CM, Harlow SD, Skurnick J, Brubaker L, Bondarenko I. Urinary incontinence predictors and life impact in ethnically diverse perimenopausal women. *Obstet Gynecol* 2002; 100: 1230–8.
53. Samuelsson E, Victor A, Svardsudd K. Determinants of urinary incontinence in a population of young and middle-aged women. *Acta Obstet Gynecol Scand* 2000; 79: 208–15.
54. Moller LA, Lose G, Jorgensen T. Risk factors for lower urinary tract symptoms in women 40–60 years of age. *Obstet Gynecol* 2000; 96: 446–51.
55. Rortveit G, Hannestad YS, Daltveit AK, Hunskaar S. Age- and type-dependent effects of parity on urinary incontinence: the Norwegian Epincont Study. *Obstet Gynecol* 2001; 98: 1004–10.
56. Mommsen S, Foldspang A. Body mass index and adult female urinary incontinence. *World J Urol* 1994; 12: 319–22.
57. Kuh D, Cardozo L, Hardy R. Urinary incontinence in middle aged women: childhood enuresis and other lifetime risk factors in a British prospective cohort. *J Epidemiol Community Health* 1999; 53: 453–8.
58. Foldspang A, Mommsen S, Lam GW, Elving L. Parity as a correlate of adult female urinary incontinence prevalence. *J Epidemiol Community Health* 1992; 46: 595–600.
59. Schmidbauer J, Temml C, Schatzl G, Haidinger G, Madersbacher S. Risk factors for urinary incontinence in both sexes – analysis of a health screening project. *Eur Urol* 2001; 39: 565–70.
60. Sommer P, Bauer T, Nielsen KK *et al.* Voiding patterns and prevalence of incontinence in women – a questionnaire survey. *Br J Urol* 1990; 66: 12–5.
61. Peyrat L, Haillet F, Bruyere F, Boutin JM, Bertrand P, Lanson Y. Prevalence and risk factors of urinary incontinence in young and middle-aged women. *Br J Urol Int* 2002; 89: 61–6.
62. Judd JT, Taylor PR, Longcope C, Jones DY, Nair PP, Campbell WS. Influence of type and amount of dietary fat on plasma hormone levels in premenopausal women. *Am J Clin Nutr* 1992; 56: 765 (Abstract 63).
63. Felson DT, Lawrence RC, Dieppe PA *et al.* Osteoarthritis: new insights. Part 1: the disease and its risk factors. *Ann Intern Med* 2000; 133: 635–46.
64. Sherburn M, Guthrie J, Dudley EOH, Dennerstein L. Is incontinence associated with menopause? *Obstet Gynecol* 2001; 98: 628–33.
65. Van Oyen H, Van Oyen P. Urinary incontinence in Belgium: prevalence, correlates and psychosocial consequences. *Acta Clinica Belgica* 2002; 57: 207–18.
66. Nygaard I, Turvey C, Burns TL, Crischilles E, Wallace R. Urinary incontinence and depression in middle-aged United States women. *Obstet Gynecol* 2003; 101: 149–56.
67. Nygaard IE, Lemke JH. Urinary incontinence in rural older women: prevalence, incidence and remission. *J Am Geriatr Soc* 1996; 44: 1049–54.

Received 11 August 2003; accepted in revised form 4 August 2005
